# Supplementary material
Source: Springer Nature journal article supplement (https://www.springermedizin.de/resource/supplementary/13099_2012_61_MOESM3_ESM.pdf/9665512)

**2009-2010  
29 KPC+ patients**

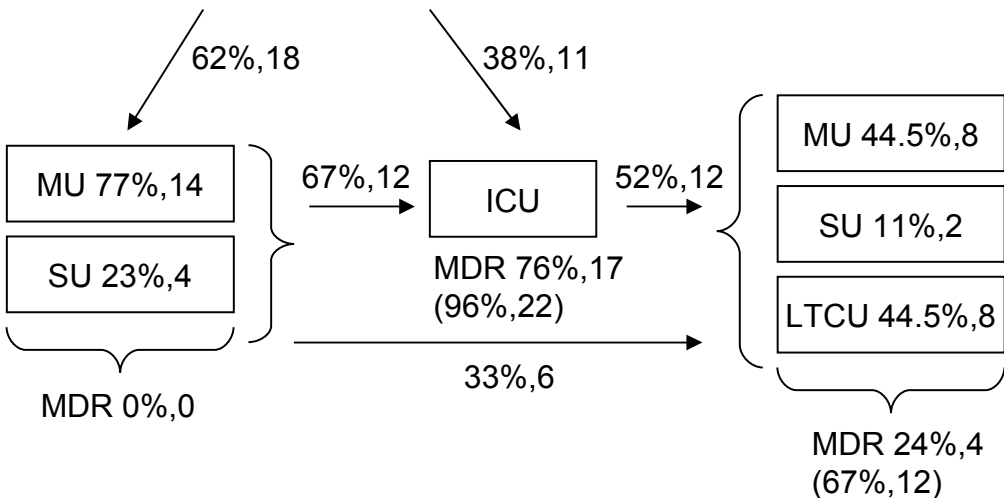

**2010-2011  
160 KPC+ patients**

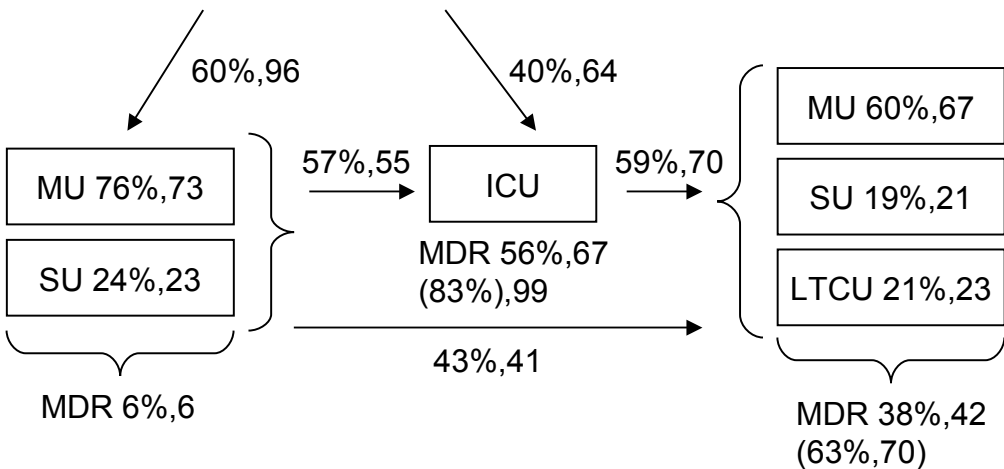

Supplement: MOESM3 [file 9665512]
